# Supplementary material for: Organic nitrate formation in the radical-initiated oxidation of model aerosol particles in the presence of NOx
Source: Royal Society of Chemistry journal article supplement (doi:10.1039/b909239k), 2009-01-01
Supplement: b909239k.pdf [file b909239k.pdf]

Supplementary information for DOI: 10.1039/b909239k

## Organic Nitrate Formation in the Radical-initiated Oxidation of Model Aerosol Particles in the Presence of $\text{NO}_x$

Lindsay H. Renbaum and Geoffrey D. Smith\*

*Chemistry Department, University of Georgia, 1001 Cedar St., Athens, GA 30602 USA, E-mail: gsmith@chem.uga.edu*

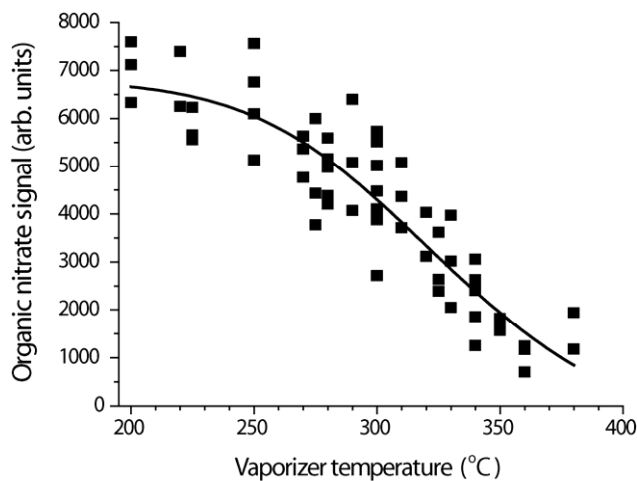

Fig. S1. Organic nitrate signal decreases at particle vaporizer temperatures above 250 °C. Experiments are typically conducted with a temperature of 230 °C so thermal degradation of the nitrate is expected to be minimal.
